# Supplementary material
Source: PubMed Central journal article supplement (PMC7575459)
Supplement: 40264_2020_981_MOESM1_ESM.pdf [file 40264_2020_981_MOESM1_ESM.pdf]

## Drug Safety

# E-Learning in Pharmacovigilance: An Evaluation of Microlearning-Based Modules Developed by Uppsala Monitoring Centre

Anna Hegerius<sup>1\*</sup> (ORCID 0000-0002-1583-2737), Pia Caduff-Janosa<sup>1</sup> (ORCID 0000-0002-5975-8858), Ruth Savage<sup>1-3</sup> (ORCID 0000-0002-8932-0849), Johan Ellenius<sup>1</sup> (ORCID 0000-0001-6447-8415)

<sup>1</sup>Uppsala Monitoring Centre, Uppsala, Sweden

<sup>2</sup>*New Zealand Pharmacovigilance Centre, Division of Health Sciences, University of Otago, Dunedin, New Zealand*

<sup>3</sup>*Department of General Practice, University of Otago, Christchurch, New Zealand*

Email: [anna.hegerius@who-umc.org](mailto:anna.hegerius@who-umc.org)

### Online resource 1

The questionnaires for modules 1-4 and module 5 respectively.

**UMC online course: Signal detection and causality assessment (user survey)**

\* 1. How did you hear about the course? (please select all relevant options)

- |                                                       |                                           |
|-------------------------------------------------------|-------------------------------------------|
| <input type="checkbox"/> E-mail from UMC              | <input type="checkbox"/> Twitter          |
| <input type="checkbox"/> UMC website                  | <input type="checkbox"/> LinkedIn         |
| <input type="checkbox"/> Facebook                     | <input type="checkbox"/> Uppsala Reports  |
| <input type="checkbox"/> YouTube                      | <input type="checkbox"/> Colleague/friend |
| <input type="checkbox"/> Other (please specify below) |                                           |

\* 2. Which device(s) did you study on? (please select all used)

- Computer/laptop
- Ipad/tablet
- Mobile phone

\* 3. Was the learning platform easy to use?

- Yes, very easy
- Yes, fairly easy
- No, not very easy

Comments:

**UMC online course: Signal detection and causality assessment (user survey)**

\* 4. Did you experience any time-lag when playing the lessons?

Yes

No

Comments:

\* 5. How would you rate the duration of the lessons?

Too short

Just right

Too long

\* 6. How would you rate the visual look of the lessons?

Good, it aided my learning

Poor, it hindered my learning

No comment

Comments:

UMC online course: Signal detection and causality assessment (*user survey*)

\* 7. Did the lecturers convey the content clearly?

- Yes, everything was easy to follow
- Yes, most of it was easy to follow
- No, it was difficult to follow

Comments:

\* 8. Was anything missing from the course?

- Yes (please specify below)
- No

Missing content:

\* 9. Did the quiz questions aid your learning?

- Yes
- No
- I have not tried the quiz yet

Comments:

**UMC online course: Signal detection and causality assessment (user survey)**

\* 10. Did you use the transcripts (read along)?

- Yes, always
- Yes, sometimes
- No, never

\* 11. Would you prefer to take the course in a different language?

- Yes (please specify below)
- No, English is fine

Preferred language:

\* 12. Would you be interested in a podcast (audio only) of the course?

- Yes
- No

\* 13. Would you appreciate the possibility to interact during the course?

- Yes, with educators
- Yes, with course participants
- Yes, with educators and course participants
- No, interaction is not needed

UMC online course: Signal detection and causality assessment (*user survey*)

\* 14. In which WHO region are you currently based?

- |                                                    |                                              |
|----------------------------------------------------|----------------------------------------------|
| <input type="radio"/> AFRO (Africa)                | <input type="radio"/> WPRO (Western Pacific) |
| <input type="radio"/> EMRO (Eastern Mediterranean) | <input type="radio"/> PAHO (The Americas)    |
| <input type="radio"/> SEARO (South-East Asia)      | <input type="radio"/> EURO (Europe)          |

\* 15. Which type of organisation/company do you work for? (primarily)

- |                                                                                 |                                                            |
|---------------------------------------------------------------------------------|------------------------------------------------------------|
| <input type="radio"/> Pharmacovigilance centre (national or regional)           | <input type="radio"/> Academia (university, hospital etc.) |
| <input type="radio"/> Drug regulatory authority (other than in a PV department) | <input type="radio"/> Pharmaceutical company               |
| <input type="radio"/> Other department under ministry of health                 | <input type="radio"/> Health organization                  |
| <input type="radio"/> Other (please specify below)                              |                                                            |

\* 16. What is your profession?

- |                                                    |                                                 |
|----------------------------------------------------|-------------------------------------------------|
| <input type="radio"/> Medical doctor               | <input type="radio"/> Dentist                   |
| <input type="radio"/> Pharmacist                   | <input type="radio"/> Other health professional |
| <input type="radio"/> Nurse                        | <input type="radio"/> Student                   |
| <input type="radio"/> Other (please specify below) |                                                 |

\* 17. For how long have you been working with pharmacovigilance?

- Less than 1 year
- 1-4 years
- More than 5 years

**UMC online course: Signal detection and causality assessment (*user survey*)**

\* 18. Do you perform signal assessments or related tasks in your daily work?

Yes

No

Comments:

\* 19. Will you be able to put what you have learnt into practice?

Yes, to a great extent

Yes, to some extent

No, not really

Comments:

**UMC online course: Signal detection and causality assessment (user survey)**

\* 20. How much of the course have you completed?

- A part of module 1
- At least module 1
- All modules

\* 21. Would you recommend the course to others?

- Yes
- No

\* 22. Overall, how would you rate the course?

| Inadequate            | Poor                  | Average               | Good                  | Excellent             |
|-----------------------|-----------------------|-----------------------|-----------------------|-----------------------|
| <input type="radio"/> |

23. Do you have any additional feedback on the course? (optional)



**UMC online course: Signal detection and causality assessment (*user survey*)**

\* 24. Do you intend to take future courses relevant to you?

Yes

No

25. Which topics would you like us to cover in future courses? (optional)

UMC online course: Statistical reasoning and algorithms in pharmacovigilance (user survey)

\* 1. How did you hear about the course? (please select all relevant options)

- |                                                       |                                           |
|-------------------------------------------------------|-------------------------------------------|
| <input type="checkbox"/> E-mail from UMC              | <input type="checkbox"/> Twitter          |
| <input type="checkbox"/> UMC website                  | <input type="checkbox"/> LinkedIn         |
| <input type="checkbox"/> Facebook                     | <input type="checkbox"/> Uppsala Reports  |
| <input type="checkbox"/> YouTube                      | <input type="checkbox"/> Colleague/friend |
| <input type="checkbox"/> Other (please specify below) |                                           |

\* 2. Which device(s) did you study on? (please select all used)

- |                                          |                                       |
|------------------------------------------|---------------------------------------|
| <input type="checkbox"/> Computer/laptop | <input type="checkbox"/> Mobile phone |
| <input type="checkbox"/> Ipad/tablet     |                                       |

\* 3. Was the learning platform easy to use?

- |                                        |                                         |
|----------------------------------------|-----------------------------------------|
| <input type="radio"/> Yes, very easy   | <input type="radio"/> No, not very easy |
| <input type="radio"/> Yes, fairly easy |                                         |

Comments:

\* 4. Did you experience any time-lag when playing the lessons?

Yes

No

Comments:

\* 5. How would you rate the duration of the lessons?

Too short

Too long

Just right

\* 6. How would you rate the visual look of the lessons?

Good, it aided my learning

No comment

Poor, it hindered my learning

Comments:

\* 7. Did the lecturers convey the content clearly?

Yes, everything was easy to follow

No, it was difficult to follow

Yes, most of it was easy to follow

Comments:

\* 8. Was anything missing from the course?

Yes (please specify below)

No

Missing content:

\* 9. Did the quiz questions aid your learning?

Yes

I have not tried the quiz yet

No

Comments:

\* 10. Which version of the course did you do?

- Without subtitles  With Spanish subtitles  
 With English subtitles

\* 11. Would you prefer subtitles in additional languages?

- Yes (please specify below)  No, English and Spanish is fine

Preferred language:

\* 12. Would you appreciate the possibility to interact during the course?

- Yes, with educators  Yes, with educators and course participants  
 Yes, with course participants  No, interaction is not needed

\* 13. In which WHO region are you currently based?

- |                                                    |                                              |
|----------------------------------------------------|----------------------------------------------|
| <input type="radio"/> AFRO (Africa)                | <input type="radio"/> WPRO (Western Pacific) |
| <input type="radio"/> EMRO (Eastern Mediterranean) | <input type="radio"/> PAHO (The Americas)    |
| <input type="radio"/> SEARO (South-East Asia)      | <input type="radio"/> EURO (Europe)          |

\* 14. Which type of organisation/company do you work for? (primarily)

- |                                                                                 |                                                              |
|---------------------------------------------------------------------------------|--------------------------------------------------------------|
| <input type="radio"/> Pharmacovigilance centre (national or regional)           | <input type="radio"/> Academia (university, hospital etc.)   |
| <input type="radio"/> Drug regulatory authority (other than in a PV department) | <input type="radio"/> Pharmaceutical company (including CRO) |
| <input type="radio"/> Other department under ministry of health                 | <input type="radio"/> Health organization                    |
| <input type="radio"/> Other (please specify below)                              |                                                              |

\* 15. What is your profession?

- |                                                    |                                                 |
|----------------------------------------------------|-------------------------------------------------|
| <input type="radio"/> Medical doctor               | <input type="radio"/> Dentist                   |
| <input type="radio"/> Pharmacist                   | <input type="radio"/> Other health professional |
| <input type="radio"/> Nurse                        | <input type="radio"/> Student                   |
| <input type="radio"/> Other (please specify below) |                                                 |

\* 16. For how long have you been working with pharmacovigilance?

- |                                        |                                         |
|----------------------------------------|-----------------------------------------|
| <input type="radio"/> Less than 1 year | <input type="radio"/> More than 5 years |
| <input type="radio"/> 1-4 years        |                                         |

\* 17. Do you perform statistical signal detection or related tasks in your daily work?

Yes

No

Comments:

\* 18. Will you be able to put what you have learnt into practice?

Yes, to a great extent

No, not really

Yes, to some extent

Comments:

UMC online course: Statistical reasoning and algorithms in pharmacovigilance (user survey)

\* 19. Have you completed the course?

Yes

No, not yet

\* 20. Would you recommend the course to others?

Yes

No

\* 21. Overall, how would you rate the course?

Inadequate

Poor

Average

Good

Excellent

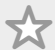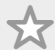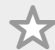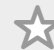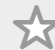

22. Do you have any additional feedback on the course? (optional)



\* 23. Do you intend to take future courses relevant to you?

Yes

No

24. Which topics would you like us to cover in future courses? (optional)
