# Supplementary material
Source: PubMed Central journal article supplement (PMC7575459)
Supplement: 40264_2020_981_MOESM2_ESM.pdf [file 40264_2020_981_MOESM2_ESM.pdf]

## Drug Safety

# E-Learning in Pharmacovigilance: An Evaluation of Microlearning-Based Modules Developed by Uppsala Monitoring Centre

Anna Hegerius<sup>1\*</sup> (ORCID 0000-0002-1583-2737), Pia Caduff-Janosa<sup>1</sup> (ORCID 0000-0002-5975-8858), Ruth Savage<sup>1-3</sup> (ORCID 0000-0002-8932-0849), Johan Ellenius<sup>1</sup> (ORCID 0000-0001-6447-8415)

<sup>1</sup>Uppsala Monitoring Centre, Uppsala, Sweden

<sup>2</sup>New Zealand Pharmacovigilance Centre, Division of Health Sciences, University of Otago, Dunedin, New Zealand

<sup>3</sup>Department of General Practice, University of Otago, Christchurch, New Zealand

Email: [anna.hegerius@who-umc.org](mailto:anna.hegerius@who-umc.org)

### Online resource 2

The country distribution and number of learners who at least had started modules 1-4 and module 5 respectively at the time of the user surveys.

| Country of residence     | Number of learners (modules 1-4) | Number of learners (module 5) | Total number of learners |
|--------------------------|----------------------------------|-------------------------------|--------------------------|
| India                    | 943                              | 951                           | 1894                     |
| United States of America | 115                              | 88                            | 203                      |
| Mexico                   | 113                              | 41                            | 154                      |
| Spain                    | 61                               | 28                            | 89                       |
| Oman                     | 3                                | 63                            | 66                       |
| Brazil                   | 37                               | 24                            | 61                       |
| Egypt                    | 37                               | 19                            | 56                       |
| United Kingdom           | 36                               | 20                            | 56                       |
| Italy                    | 25                               | 22                            | 47                       |
| Germany                  | 28                               | 18                            | 46                       |
| Canada                   | 26                               | 18                            | 44                       |
| Romania                  | 23                               | 18                            | 41                       |
| China                    | 17                               | 20                            | 37                       |
| Colombia                 | 26                               | 7                             | 33                       |
| Saudi Arabia             | 20                               | 13                            | 33                       |
| United Arab Emirates     | 14                               | 18                            | 32                       |
| Sweden                   | 12                               | 15                            | 27                       |
| Peru                     | 18                               | 7                             | 25                       |
| Costa Rica               | 17                               | 7                             | 24                       |

|                                       |    |    |    |
|---------------------------------------|----|----|----|
| Pakistan                              | 7  | 17 | 24 |
| Iraq                                  | 2  | 21 | 23 |
| Croatia                               | 14 | 8  | 22 |
| Ecuador                               | 9  | 11 | 20 |
| Russian Federation                    | 16 | 4  | 20 |
| Serbia                                | 11 | 9  | 20 |
| Australia                             | 13 | 6  | 19 |
| Argentina                             | 11 | 7  | 18 |
| Chile                                 | 12 | 6  | 18 |
| Albania                               | 10 | 7  | 17 |
| Switzerland                           | 6  | 11 | 17 |
| France                                | 9  | 7  | 16 |
| Ireland                               | 7  | 9  | 16 |
| Singapore                             | 13 | 3  | 16 |
| Eritrea                               | 12 | 2  | 14 |
| South Africa                          | 8  | 6  | 14 |
| Armenia                               | 3  | 10 | 13 |
| Nigeria                               | 7  | 6  | 13 |
| Poland                                | 9  | 4  | 13 |
| Ukraine                               | 8  | 5  | 13 |
| Belgium                               | 5  | 6  | 11 |
| Philippines                           | 8  | 3  | 11 |
| Ghana                                 | 5  | 5  | 10 |
| Malaysia                              | 4  | 6  | 10 |
| Nepal                                 | 8  | 2  | 10 |
| Portugal                              | 7  | 3  | 10 |
| Qatar                                 | 6  | 4  | 10 |
| Hungary                               | 6  | 3  | 9  |
| Venezuela (Bolivarian<br>Republic of) | 7  | 2  | 9  |
| El Salvador                           | 4  | 4  | 8  |
| Greece                                | 3  | 5  | 8  |
| Israel                                | 6  | 2  | 8  |
| Netherlands                           | 7  | 1  | 8  |
| Turkey                                | 2  | 6  | 8  |
| Czech Republic                        | 4  | 3  | 7  |
| Republic of Korea                     | 5  | 2  | 7  |
| Sudan                                 | 4  | 3  | 7  |
| Uganda                                | 6  | 1  | 7  |
| Indonesia                             | 4  | 2  | 6  |
| Japan                                 | 1  | 5  | 6  |
| Kenya                                 | 5  | 1  | 6  |
| Lebanon                               | 2  | 4  | 6  |
| Tunisia                               | 2  | 4  | 6  |
| Azerbaijan                            | 4  | 1  | 5  |

|                                  |   |   |   |
|----------------------------------|---|---|---|
| Estonia                          | 2 | 3 | 5 |
| Gambia                           | 5 |   | 5 |
| Lithuania                        | 4 | 1 | 5 |
| New Zealand                      | 1 | 4 | 5 |
| North Macedonia                  | 4 | 1 | 5 |
| Botswana                         |   | 4 | 4 |
| Kyrgyzstan                       | 3 | 1 | 4 |
| Moldova, Republic of             | 4 |   | 4 |
| Morocco                          | 3 | 1 | 4 |
| Somalia                          | 2 | 2 | 4 |
| Viet Nam                         | 2 | 2 | 4 |
| Belize                           | 2 | 1 | 3 |
| Bhutan                           | 2 | 1 | 3 |
| Bulgaria                         | 3 |   | 3 |
| Cuba                             | 2 | 1 | 3 |
| Cyprus                           |   | 3 | 3 |
| Ethiopia                         | 2 | 1 | 3 |
| Finland                          | 2 | 1 | 3 |
| Guatemala                        | 3 |   | 3 |
| Iran (Islamic Republic of)       | 2 | 1 | 3 |
| Jordan                           | 3 |   | 3 |
| Libya                            | 3 |   | 3 |
| Thailand                         | 3 |   | 3 |
| Zimbabwe                         | 2 | 1 | 3 |
| Afghanistan                      | 1 | 1 | 2 |
| Austria                          | 2 |   | 2 |
| Bahrain                          | 1 | 1 | 2 |
| Bangladesh                       | 2 |   | 2 |
| Barbados                         | 2 |   | 2 |
| Belarus                          | 2 |   | 2 |
| Bosnia and Herzegovina           |   | 2 | 2 |
| Democratic Republic of the Congo | 1 | 1 | 2 |
| Denmark                          | 2 |   | 2 |
| Kazakhstan                       | 2 |   | 2 |
| Latvia                           |   | 2 | 2 |
| Montenegro                       | 1 | 1 | 2 |
| Nicaragua                        | 1 | 1 | 2 |
| Norway                           | 2 |   | 2 |
| Sierra Leone                     | 2 |   | 2 |
| Turkmenistan                     | 2 |   | 2 |
| Uzbekistan                       | 1 | 1 | 2 |
| Zambia                           | 1 | 1 | 2 |
| Algeria                          |   | 1 | 1 |
| Benin                            | 1 |   | 1 |

|                                  |             |             |             |
|----------------------------------|-------------|-------------|-------------|
| Bolivia (Plurinational State of) | 1           |             | 1           |
| Brunei Darussalam                | 1           |             | 1           |
| Burkina Faso                     | 1           |             | 1           |
| Burundi                          |             | 1           | 1           |
| Cameroon                         | 1           |             | 1           |
| Cape Verde                       | 1           |             | 1           |
| Chad                             | 1           |             | 1           |
| Côte d'Ivoire                    |             | 1           | 1           |
| Dominican Republic               |             | 1           | 1           |
| Eswatini                         |             | 1           | 1           |
| Fiji                             | 1           |             | 1           |
| Georgia                          | 1           |             | 1           |
| Haiti                            | 1           |             | 1           |
| Jamaica                          | 1           |             | 1           |
| Kuwait                           |             | 1           | 1           |
| Lesotho                          | 1           |             | 1           |
| Malawi                           | 1           |             | 1           |
| Maldives                         | 1           |             | 1           |
| Mali                             | 1           |             | 1           |
| Mauritius                        | 1           |             | 1           |
| Mongolia                         | 1           |             | 1           |
| Panama                           | 1           |             | 1           |
| Saint Vincent and the Grenadines | 1           |             | 1           |
| Slovenia                         |             | 1           | 1           |
| Sri Lanka                        | 1           |             | 1           |
| Syrian Arab Republic             | 1           |             | 1           |
| Trinidad and Tobago              | 1           |             | 1           |
| United Republic of Tanzania      |             | 1           | 1           |
| Uruguay                          | 1           |             | 1           |
| Yemen                            | 1           |             | 1           |
| Unknown                          | 86          | 3           | 89          |
| <b>Total</b>                     | <b>2067</b> | <b>1685</b> | <b>3752</b> |
